# Supplementary material
Source: publisher figshare collection journal article supplement (https://acs.figshare.com/ndownloader/files/24504057)
Supplement: Supplementary file 1 [file 24504057]

# Supporting Information

## **Delineating the Capacity Fading Mechanisms of $\text{Na}(\text{Ni}_{0.3}\text{Fe}_{0.4}\text{Mn}_{0.3})\text{O}_2$ at Higher Operating Voltages in Sodium-ion Cells**

Julia Lamb, Lauren Stokes, Arumugam Manthiram

*McKetta Department of Chemical Engineering & Texas Materials Institute, The University of Texas at Austin, Austin, Texas, 78712, USA*

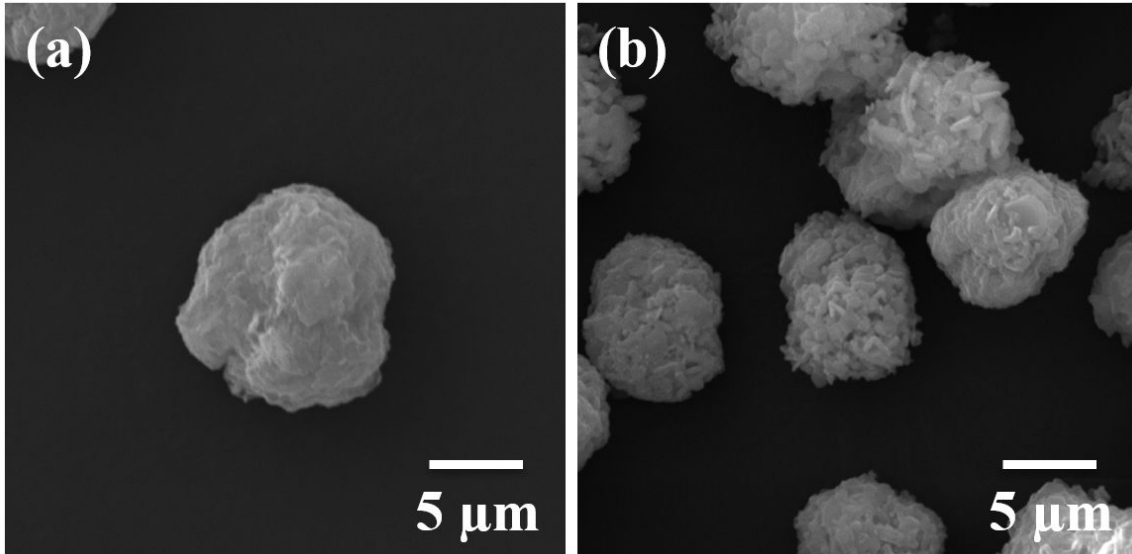

**Figure S1.** SEM images of (a) hydroxide M(OH) precursor and (b) pristine, calcined  $\text{Na}(\text{Ni}_{0.3}\text{Fe}_{0.4}\text{Mn}_{0.3})\text{O}_2$ .

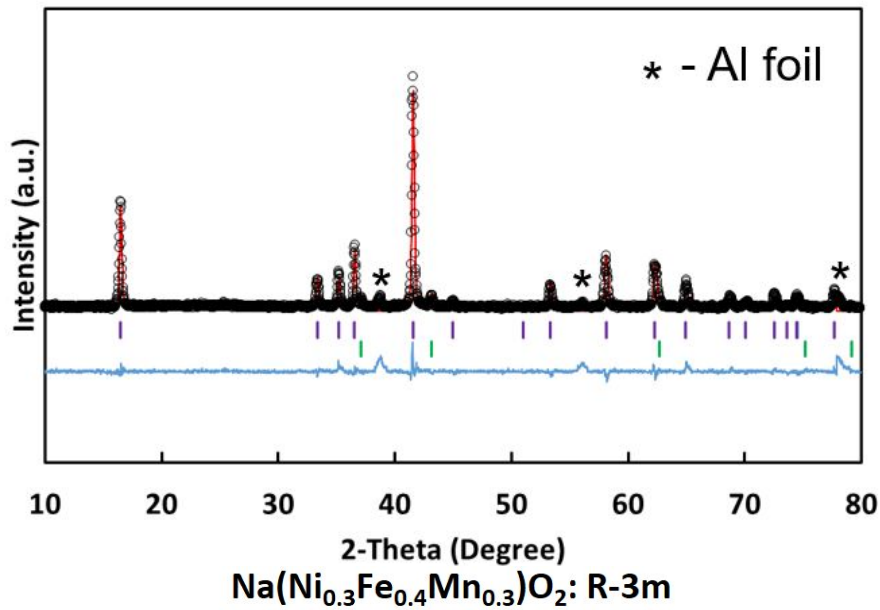

| Atom | Site | x | y | z       | Occ. |
|------|------|---|---|---------|------|
| Na   | -3m  | 0 | 0 | 0       | 1    |
| Ni   | -3m  | 0 | 0 | 1/2     | 0.3  |
| Mn   | -3m  | 0 | 0 | 1/2     | 0.3  |
| Fe   | -3m  | 0 | 0 | 1/2     | 0.4  |
| O    | 3m   | 0 | 0 | 0.23478 | 1    |

$a = 2.977232 \text{ \AA}$ ;  $c = 16.094767 \text{ \AA}$ ;  $V = 123.549 \text{ \AA}^3$ ;  $R_p = 15.665 \%$ ;  $R_{wp} = 16.498 \%$

NiO Phase fraction: 7.32 %

**Figure S2.** Rietveld refinement and the associated crystallographic data of pristine O3  $\text{Na}(\text{Ni}_{0.3}\text{Fe}_{0.4}\text{Mn}_{0.3})\text{O}_2$ .

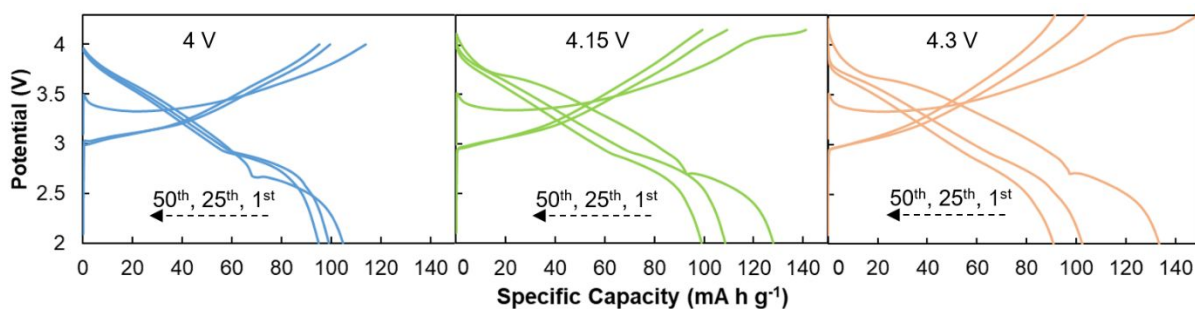

**Figure S3.** The 1<sup>st</sup>, 25<sup>th</sup>, and 50<sup>th</sup> charge-discharge profiles of NFM343 half cells charged up to varying voltages at a current rate of  $C/5$ .

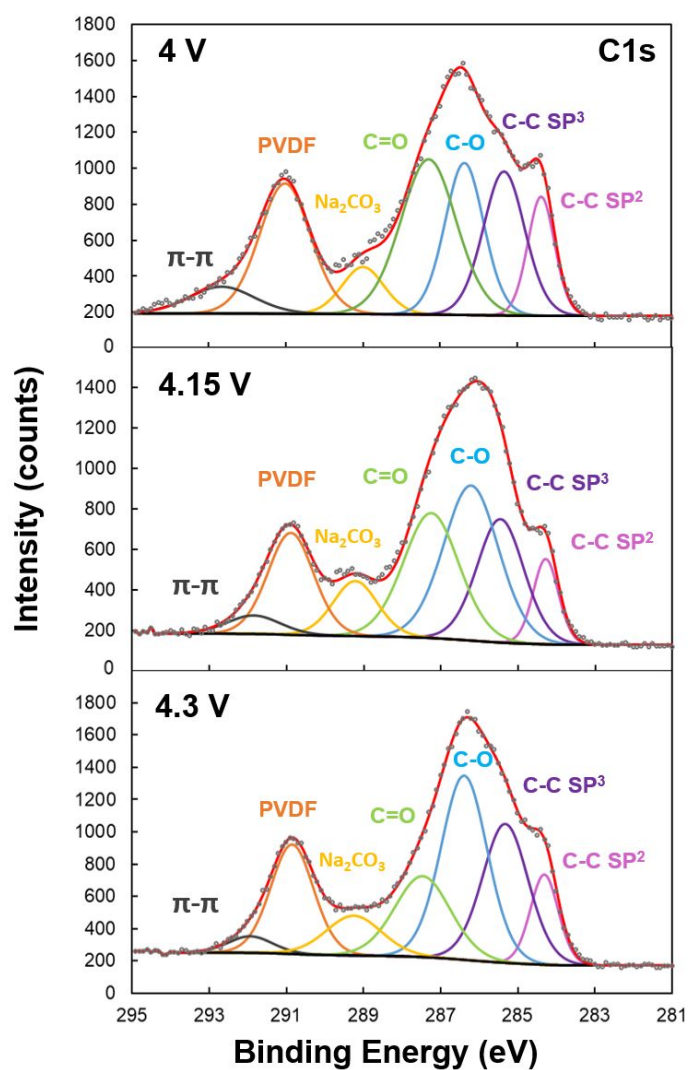

**Figure S4.** XPS data of the carbon (C1s) region performed on cathode material after 5 cycles.

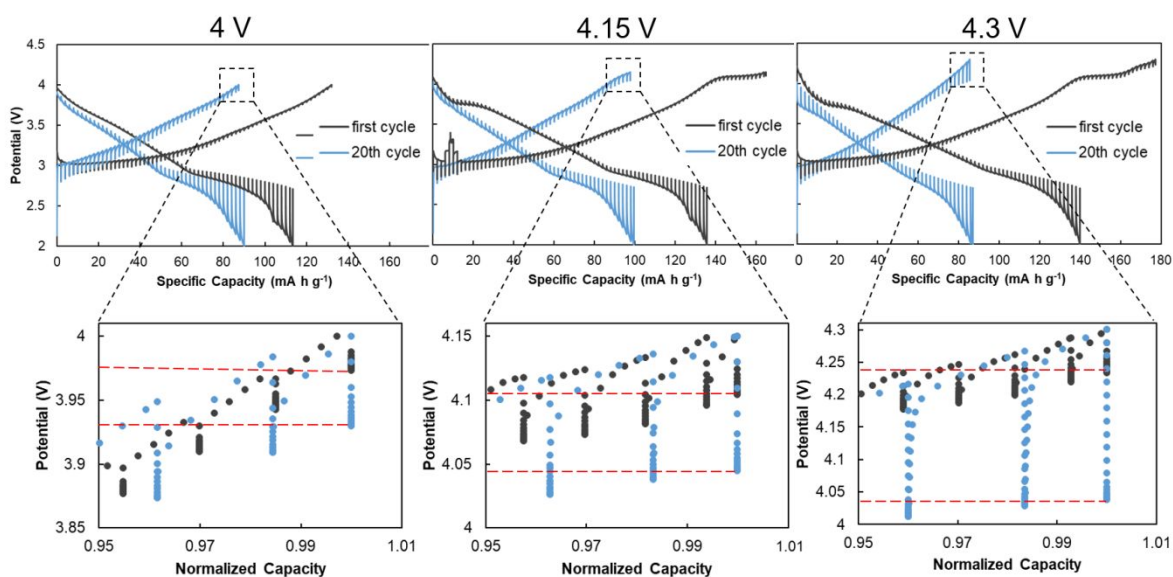

**Figure S5.** GITT on NFM charged to varying voltages with a 5 minute current step at  $C/5$  rate, followed by a 10 minute rest step. Between the first and 20<sup>th</sup> GITT cycles, cells were cycled without intermittent resting at 1C rate. Bottom row shows the normalized capacity for direct comparison of impedance growth between the 1<sup>st</sup> and 20<sup>th</sup> cycle.

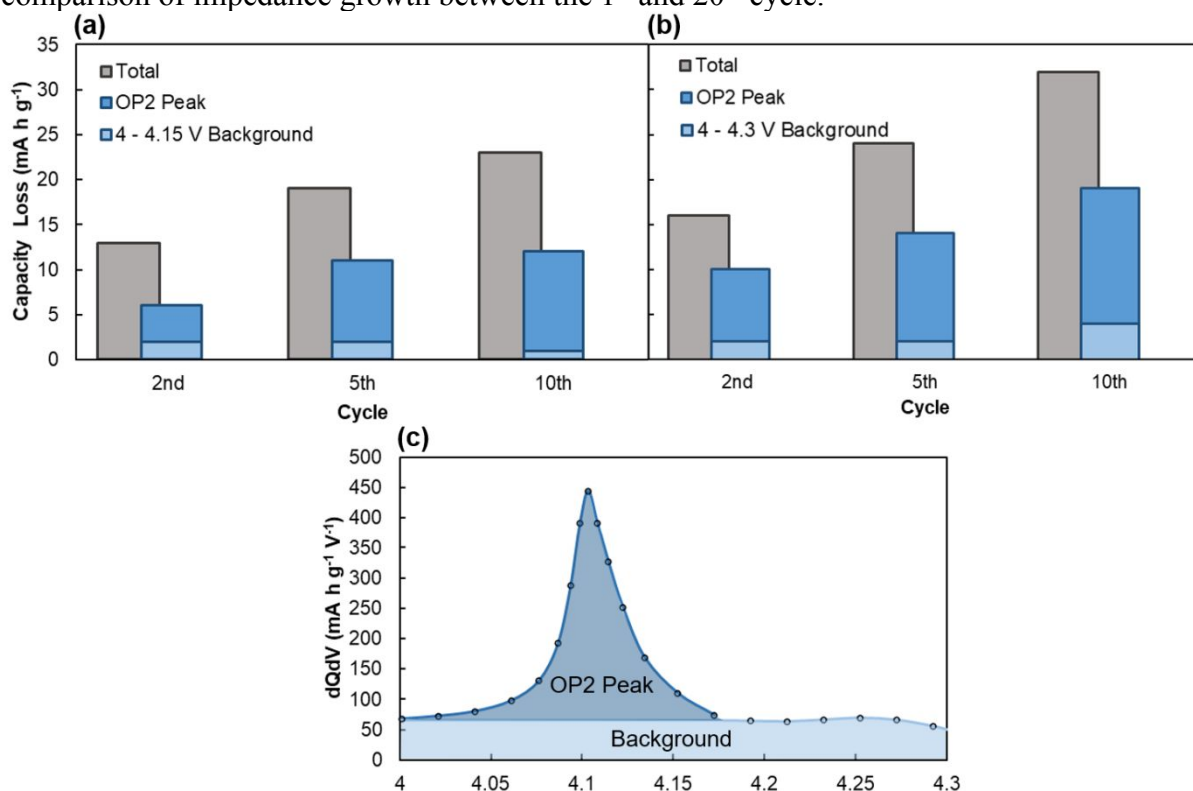

**Figure S6.** (a) and (b) Charge capacity lost between a given cycle and the first cycle when charged up to 4.15 and 4.3 V, respectively. Total capacity lost includes the entire voltage range, while the background and OP2 peak are constrained to the voltage region of  $> 4$  V. (c) The background versus OP2 peak area on the first cycle of a 4.3 V cell.

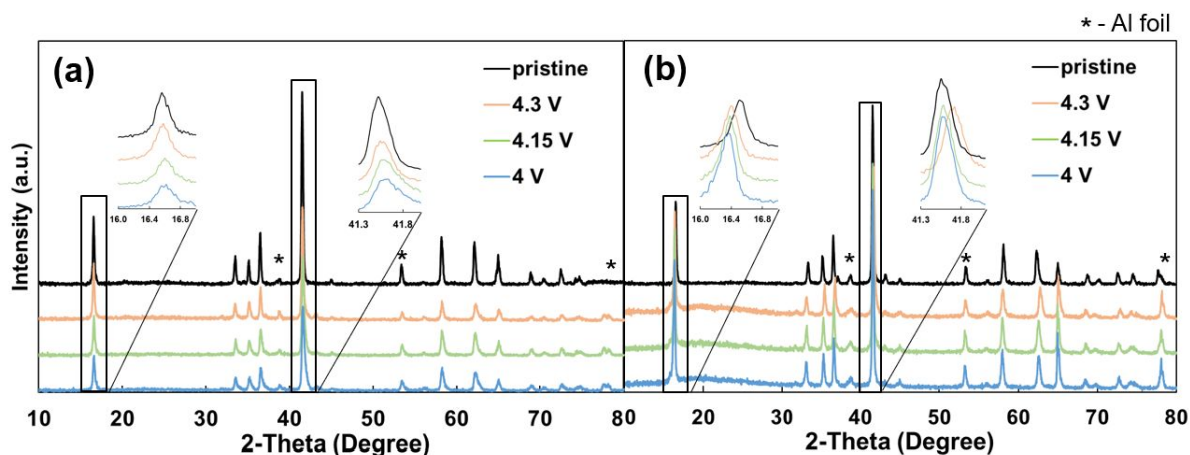

**Figure S7.** *Ex-situ* XRD performed on cathodes after (a) 20 cycles at 1C rate and (b) 50 cycles at 1C rate, compared to the pristine, uncycled cathode.

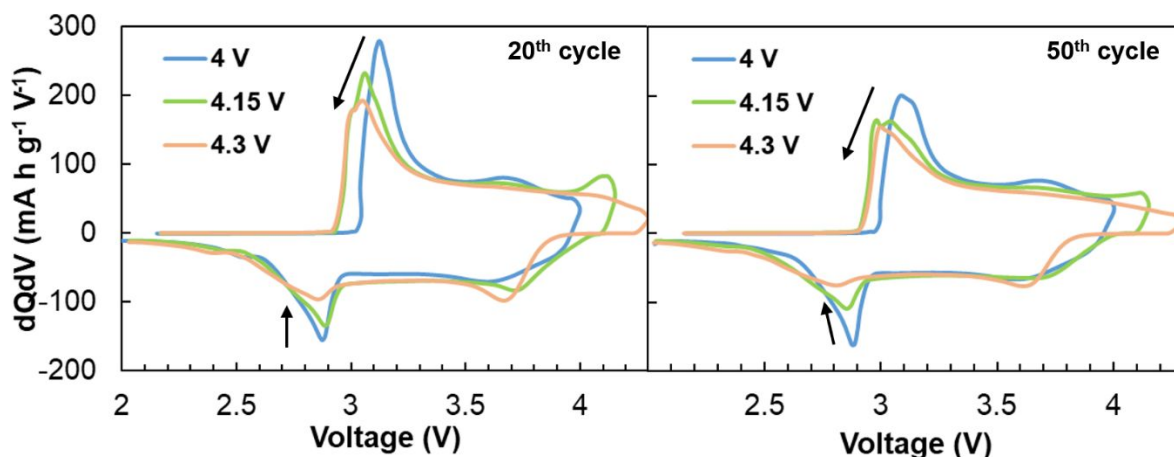

**Figure S8.**  $dQ/dV$  plot of the 20<sup>th</sup> and 50<sup>th</sup> cycles of cells cycled at  $C/5$  rate to varying voltages, showing a decrease in the lower voltage O3 to P3 phase transition. Data were averaged for reduced noise.

**Table S1.** Equivalent circuit used for fitting EIS curves and resistance values of each semi-circle with standard deviation. R2 corresponds to  $R_f$  and R4 to  $R_{ct}$ .

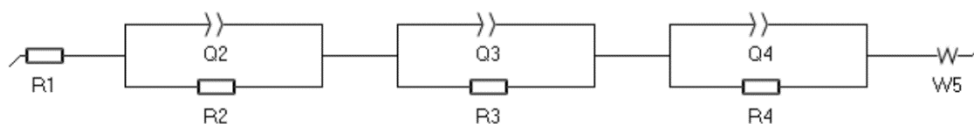

|            | 4 V |      |       |      |
|------------|-----|------|-------|------|
|            | R2  | R3   | R4    | S.D. |
| 1st cycle  | 4.6 | 31.7 | 157.1 | 0.6  |
| 5th cycle  | 6.2 | 28.2 | 188.3 | 0.4  |
| 20th cycle | 7.8 | 22.4 | 132.9 | 0.7  |

  

|  | 4.15 V |  |  |  |
|--|--------|--|--|--|
|--|--------|--|--|--|

|            | R2   | R3   | R4    | S.D. |
|------------|------|------|-------|------|
| 1st cycle  | 7.0  | 38.9 | 122.9 | 2.9  |
| 5th cycle  | 10.5 | 31.3 | 141.4 | 0.6  |
| 20th cycle | 12.9 | 27.5 | 171.5 | 0.6  |

  

| 4.3 V      |      |      |       |      |
|------------|------|------|-------|------|
|            | R2   | R3   | R4    | S.D. |
| 1st cycle  | 6.8  | 32.4 | 120.2 | 0.6  |
| 5th cycle  | 8.7  | 30.4 | 162.4 | 0.6  |
| 20th cycle | 13.8 | 23.4 | 237.4 | 0.6  |

**Table S2.** Lattice constants and volume per formula unit of each phase, showing the expansion and contraction that occurs during cycling.

|                             | a        | c        | V per formula unit |
|-----------------------------|----------|----------|--------------------|
| Discharged state (O3 phase) | 16.09477 | 2.977232 | 41.18              |
| 4 V (P3 phase)              | 16.931   | 2.9214   | 41.71              |
| change from O3              | 5.2%     | -1.9%    | 1.3%               |
| 4.3 V (OP2 phase)           | 10.61    | 2.895    | 38.50              |
| change from P3              | -6.0%    | -0.9%    | -7.7%              |

**Table S3.** The total capacity contribution ( $\text{mA h g}^{-1}$ ) of the P3 to OP2 phase transition at cycle numbers 1, 2, 5, and 10 on cells charged up to 4.15 and 4.3 V. Calculated by measuring the area under the corresponding peak in the  $dQ/dV$  plot relative to any non-peak area above 4 V. Total charge capacity at each cycle is given for reference.

| Capacity Contribution Above 4 V - 4.15 V |              |          |            |     |
|------------------------------------------|--------------|----------|------------|-----|
| Cycle #                                  | Total Charge | OP2 Peak | Background | Sum |
| 1st                                      | 141          | 16       | 10         | 26  |
| 2nd                                      | 128          | 12       | 8          | 21  |
| 5th                                      | 122          | 7        | 8          | 16  |
| 10th                                     | 118          | 5        | 9          | 14  |

  

| Capacity Contribution Above 4 V - 4.3 V |              |          |            |     |
|-----------------------------------------|--------------|----------|------------|-----|
| Cycle #                                 | Total Charge | OP2 Peak | Background | Sum |
| 1st                                     | 149          | 16       | 20         | 36  |
| 2nd                                     | 133          | 8        | 18         | 26  |
| 5th                                     | 125          | 4        | 18         | 21  |
| 10th                                    | 117          | 1        | 16         | 17  |
